# Supplementary material
Source: publisher site journal article supplement (https://www.degruyterbrill.com/publication/isbn/9783805913041/downloadAsset/9783805913041_Inhaltsverzeichnis.pdf)
Supplement: Supplementary file 1 [file 9783805913041_Inhaltsverzeichnis.pdf]

# Inhaltsübersicht

|                                                | Seite <sup>*</sup> |
|------------------------------------------------|--------------------|
| Buch 3 · Sachenrecht<br>Abschnitt 3 · Eigentum |                    |
| Einleitung zu §§ 903 ff. _____                 | 1                  |
| Titel 1 · Inhalt des Eigentums _____           | 63                 |
| Sachregister _____                             | 535                |

---

<sup>\*</sup> Zitiert wird nicht nach Seiten, sondern nach Paragraph bzw Artikel und Randnummer; siehe dazu auch „Zitierweise“.
